# Supplementary material for: Kilogram-scale fabrication of TiO2 nanoparticles modified with carbon dots with enhanced visible-light photocatalytic activity
Source: Royal Society of Chemistry journal article supplement (doi:10.1039/d2na00886f), 2023-01-01
Supplement: d2na00886f1.pdf [file d2na00886f1.pdf]

## Electronic Supporting Information

# Kilogram-scale fabrication of TiO<sub>2</sub> nanoparticles modified by carbon dots with enhanced visible-light photocatalytic activity

*Jingjing Xu,<sup>‡ a</sup> Jiayan Zhang,<sup>‡ a</sup> Feifei Tao,<sup>\* ab</sup> Pengfei Liang,<sup>a</sup> and Pingan Zhang<sup>a</sup>*

<sup>a</sup> Department of Chemistry and Chemical Engineering, Shaoxing University, Zhejiang 312000, P. R. China

<sup>b</sup> Shanghai Advanced Research Institute, Chinese Academy of Sciences, Shanghai 201210, P. R. China

<sup>‡</sup> These authors contribute equally to this paper and should be considered as co-first author.

<sup>\*</sup> Correspondence: feifeitao@usx.edu.cn; Tel.: +86-575-88342505

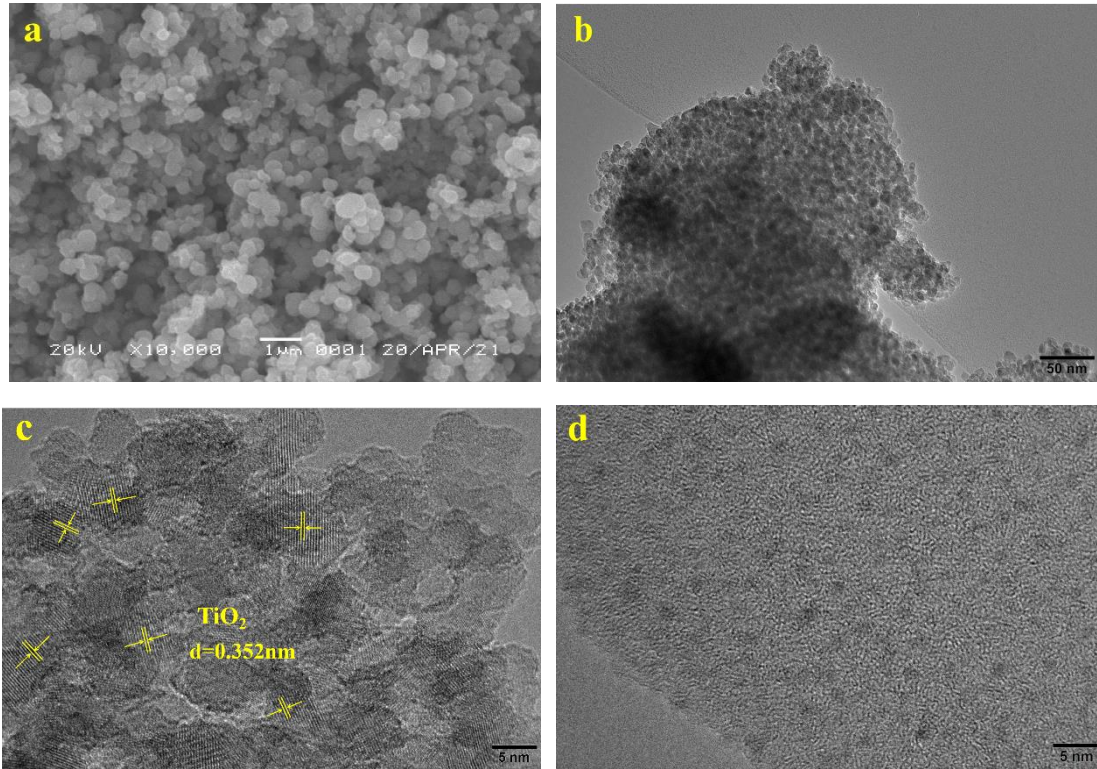

**Fig. S1** SEM (a) and HRTEM (b-d) images of  $\text{TiO}_2$  NPs (a-c) and CDs (d).

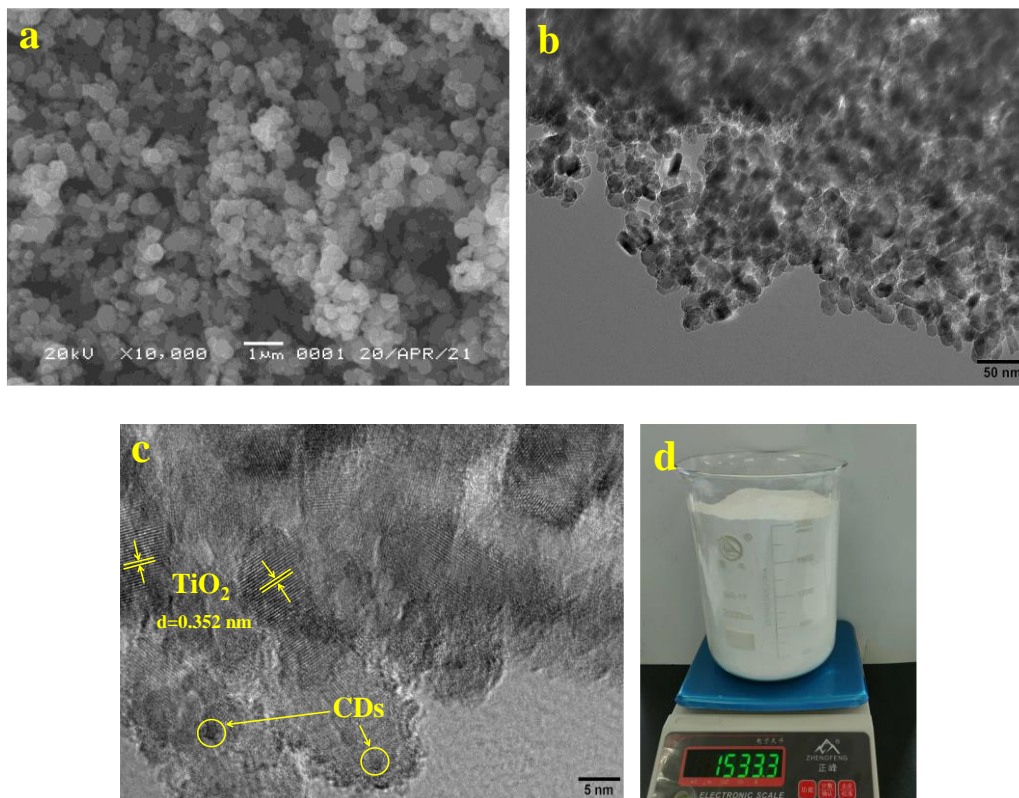

**Fig. S2** SEM (a), HRTEM (b,c) and optical (d) images of kCT2.

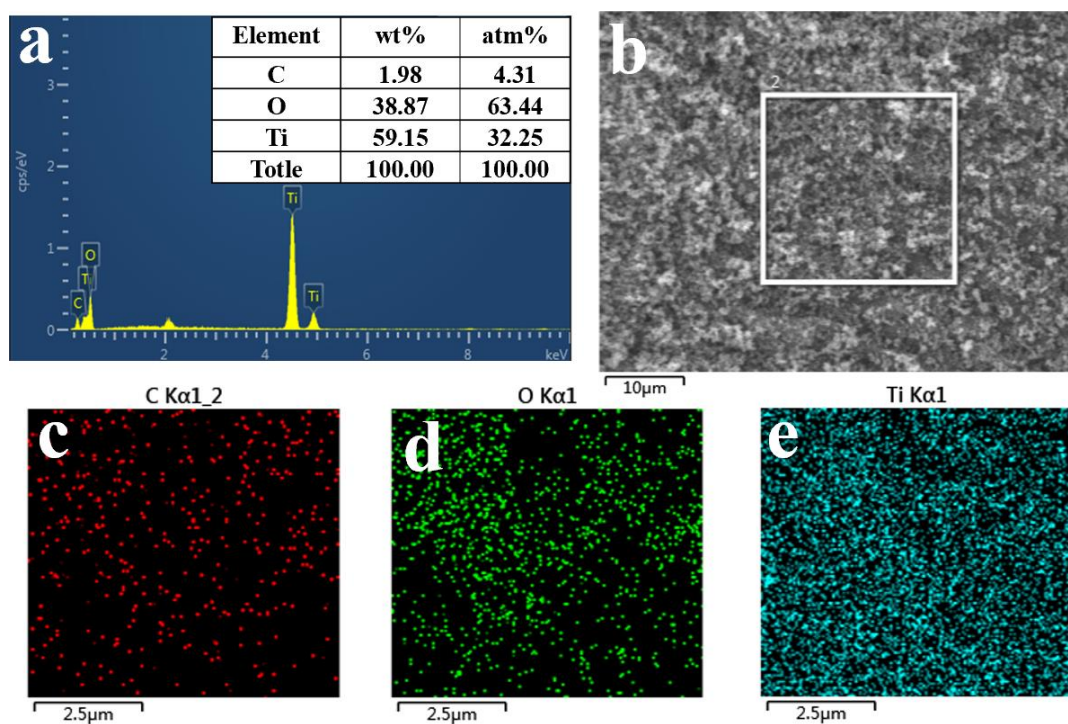

**Fig. S3** EDS curve (a), SEM image (b) of kCT2, and the corresponding element mapping of C (c), O (d) and Ti (e) elements.

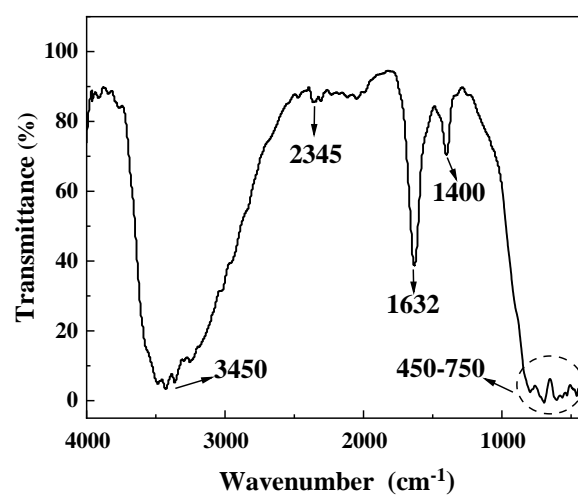

**Fig. S4** FT-IR spectrum of kCT2.

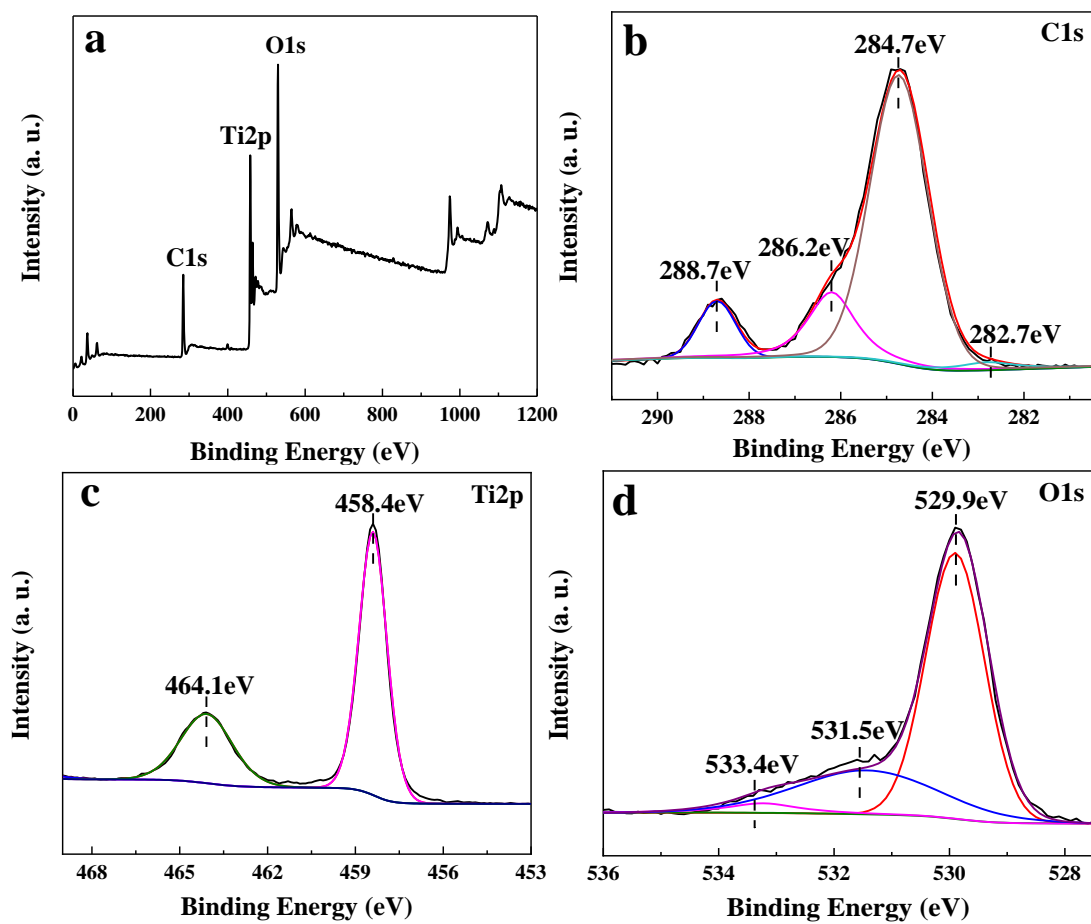

**Fig. S5** XPS survey spectra (a), and the corresponding high-resolution XPS spectra of C 1s (b), Ti 2p (c) and O 1s (d) of kCT2.

**Table S1** Comparison of photocatalytic degradation of MO over various non-metallic coupled TiO<sub>2</sub> photocatalysts.

| Photocatalyst                                                                              | Light source                                   | Photocatalytic condition                                                 | Degradation activity                                                        | Degradation rate / (mmol·g <sup>-1</sup> ·h <sup>-1</sup> ) | Ref.       |
|--------------------------------------------------------------------------------------------|------------------------------------------------|--------------------------------------------------------------------------|-----------------------------------------------------------------------------|-------------------------------------------------------------|------------|
| CDs/TiO <sub>2</sub> NPs (CT2 and kCT2)                                                    | 300 W Xenon arc lamp ( $\lambda > 420$ nm)     | Photocatalyst: 30 mg<br>MO solution: 30 mL,<br>10 mg·L <sup>-1</sup>     | 88.8% (120 min, CT2)<br>88.6% (120 min, kCT2)                               | 0.0136 (CT2)<br>0.0135 (kCT2)                               | This study |
| C-TiO <sub>2</sub> /g-C <sub>3</sub> N <sub>4</sub> nanocomposite                          | 300 W Xenon lamp ( $\lambda > 400$ nm)         | Photocatalyst: 50 mg<br>MO solution: 50 mL,<br>20 mg·L <sup>-1</sup>     | 98.6% (60 min)                                                              | 0.0602                                                      | 1          |
| Nanohybrids TiO <sub>2</sub> /CNTs materials                                               | 150 W Xenon lamp ( $\lambda > 420$ nm)         | Photocatalyst: 25 mg<br>MO solution: 50 mL,<br>10 mg·L <sup>-1</sup>     | 33% (240 min)                                                               | 0.00504                                                     | 2          |
| GO/TiO <sub>2</sub> composites                                                             | Sunlight or 48 W UV lamp ( $\lambda = 240$ nm) | Photocatalyst: 100 mg<br>MO solution: 100 mL, 20 mg·L <sup>-1</sup>      | 40% (Sunlight for 240 min)<br>85.73% (UV light for 240 min)                 | 0.00611 (Sunlight)<br>0.0131 (UV light)                     | 3          |
| Graphite/C-doped TiO <sub>2</sub> composite                                                | 500 W Xenon lamp ( $\lambda < 420$ nm)         | Photocatalyst: 50 mg<br>MO solution: 30 mL,<br>10 mg·L <sup>-1</sup>     | 77.5% (120 min)                                                             | 0.00710                                                     | 4          |
| g-C <sub>3</sub> N <sub>4</sub> coupled with high specific area TiO <sub>2</sub> composite | 300 W Xenon lamp                               | Photocatalyst: 100 mg<br>MO solution: 40 mL,<br>1×10 <sup>-4</sup> mol/L | 92.44% (100 min)                                                            | 0.0222                                                      | 5          |
| C, N, F-tridoped TiO <sub>2</sub> nanotubes                                                | 300 W mercury lamp or 500 W Xenon lamp         | Photocatalyst: 50 mg<br>MO solution: 60 mL,<br>20 mg·L <sup>-1</sup>     | completely degraded (UV light for 50 min or simulated sunlight for 300 min) | 0.0880 (UV light)<br>0.0147 (Simulated sunlight)            | 6          |
| N-doped mesoporous black TiO <sub>2</sub> photocatalyst                                    | 350 W Xenon lamp ( $\lambda > 420$ nm)         | Photocatalyst: 25 mg<br>MO solution: 30 mL,<br>10 mg·L <sup>-1</sup>     | 93.27% (150 min)                                                            | 0.0137                                                      | 7          |
| Nitrogen-doped TiO <sub>2</sub> nanoparticles sensitized by hematoporphyrin                | 150 W metal halide lamp                        | Photocatalyst: 300 mg<br>MO solution: 300 mL, 5.0 mg·L <sup>-1</sup>     | 88.5% (180 min)                                                             | 0.00451                                                     | 8          |

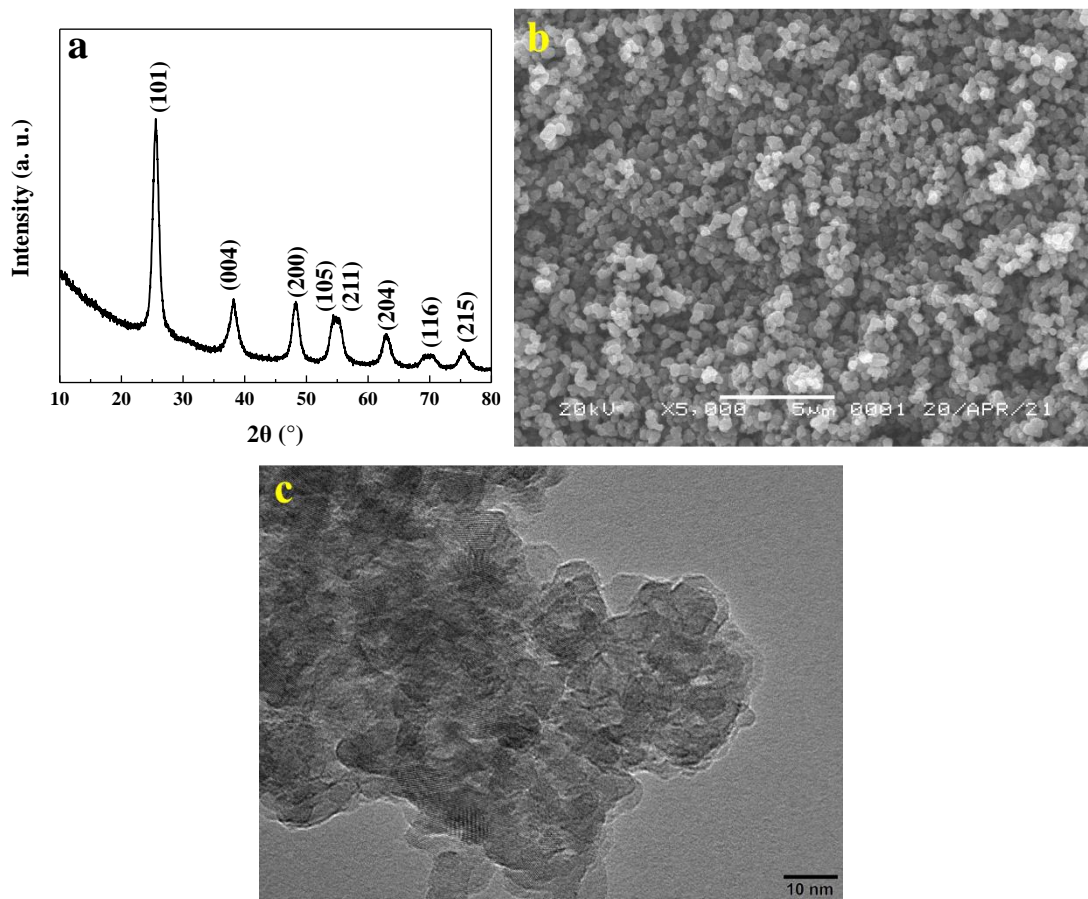

**Fig. S6** XRD pattern (a), SEM image (b) and HRTEM image of kCT2 after 5 cycles (c).

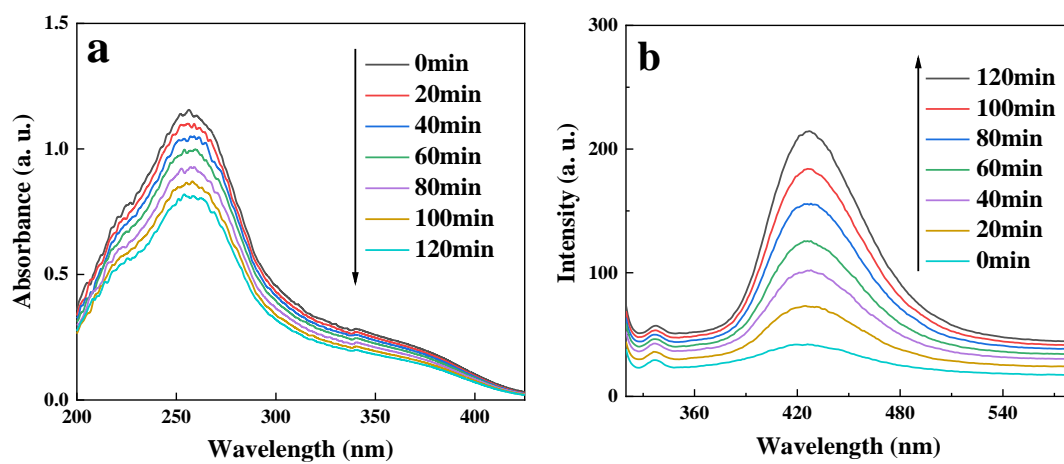

**Fig. S7** UV-vis absorption spectra of NBT (a) and PL spectra of 2-TAOH in the presence of kCT2 (b).

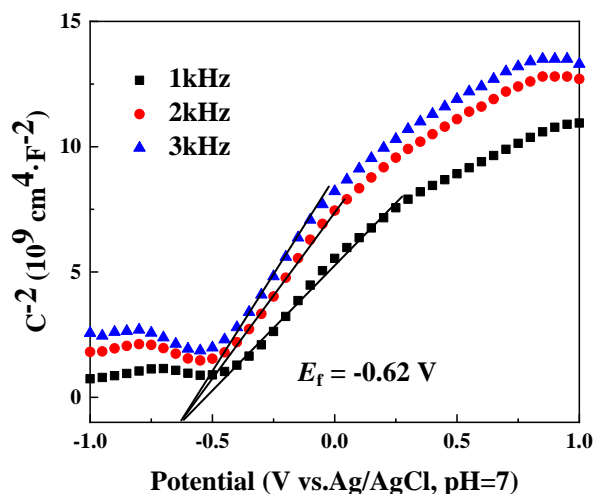

**Fig. S8** M-S plots of TiO<sub>2</sub> NPs.

### Reference

- 1 Z. Lu, L. Zeng, W. Song, Z. Qin, D. Zeng and C. Xie, *Appl. Catal., B*, 2017, **202**, 489-499.
- 2 K. C. Nguyen, M. P. Ngoc and M. V. Nguyen, *Mater. Lett.*, 2016, **165**, 247-251.
- 3 C. Lin, Y. Gao, J. Zhang, D. Xue, H. Fang, J. Tian, C. Zhou, C. Zhang, Y. Li and H. Li, *J. Mater. Res.*, 2020, **35**, 1307-1315.
- 4 J. Jia, D. Li, J. Wan and X. Yu, *J. Ind. Eng. Chem.*, 2016, **33**, 162-169.
- 5 M.-Y. Song, D.-W. Sun, R.-Q. Guan, J.-X. Li, H.-J. Zhai, L.-J. Wang, M.-Y. Sun, J.-W. Kang, J.-K. Zhang, Z. Zhao and X.-H. Li, *Chinese J. Chem. Phys.*, 2021, **34**, 210-216.
- 6 X. Wang, L.-L. Wang, D. Guo, L.-L. Ma, B.-L. Zhu, P. Wang, G.-C. Wang, S.-M. Zhang and W.-P. Huang, *Catal. Today*, 2019, **327**, 182-189.
- 7 H. Zhang, Y. Zhang, J. Yin, Z. Li, Q. Zhu and Z. Xing, *Chem. Phys.*, 2018, **513**, 86-93.
- 8 J. Saien and Z. Mesgari, *J. Mol. Catal., A*, 2016, **414**, 108-115.
